# Supplementary material for: Principios de financiación de las pensiones de seguridad social
Source: Springer Nature journal article supplement (doi:10.1186/s13058-023-01721-5), 1996-01-01

Additional file 7: Full western blot image corresponding to Fig.1H, Fig.S1G, Fig.2B, Fig.S2D, Fig.S3D, and Fig.S4F.

Fig.1H-(B7-H4)

M:Marker

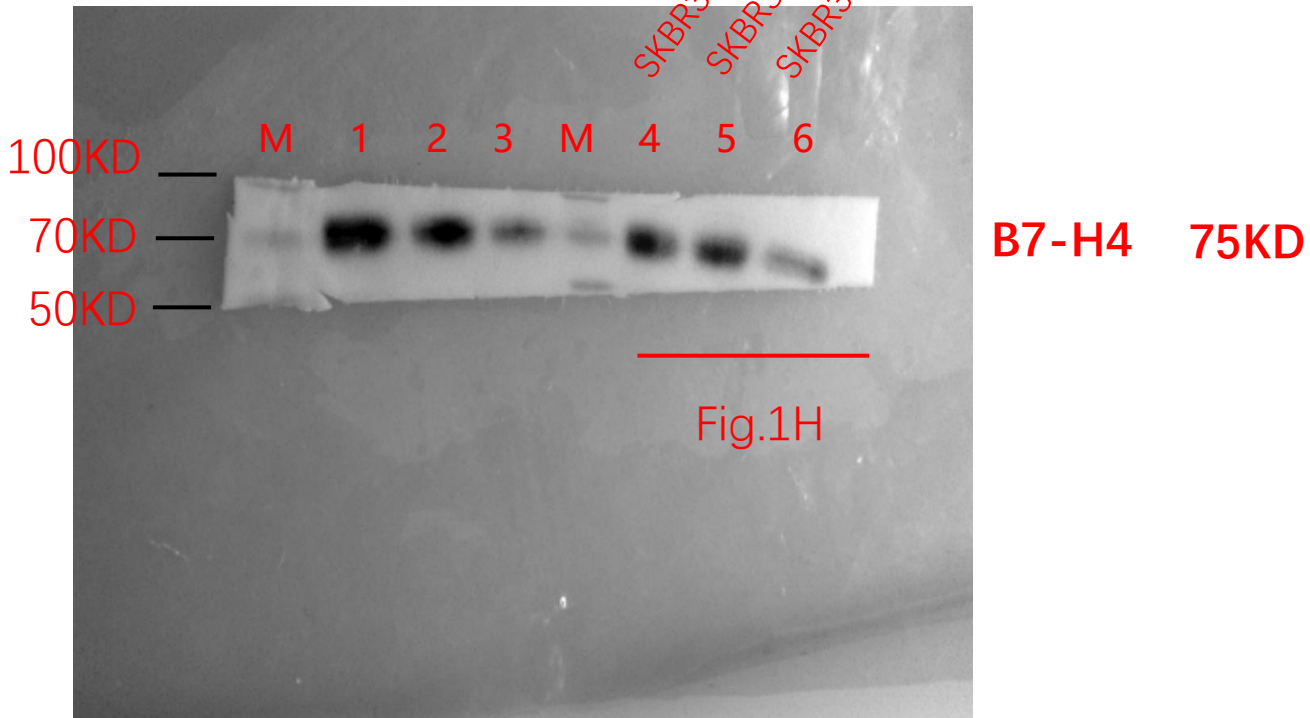

Fig.1H-(actin)

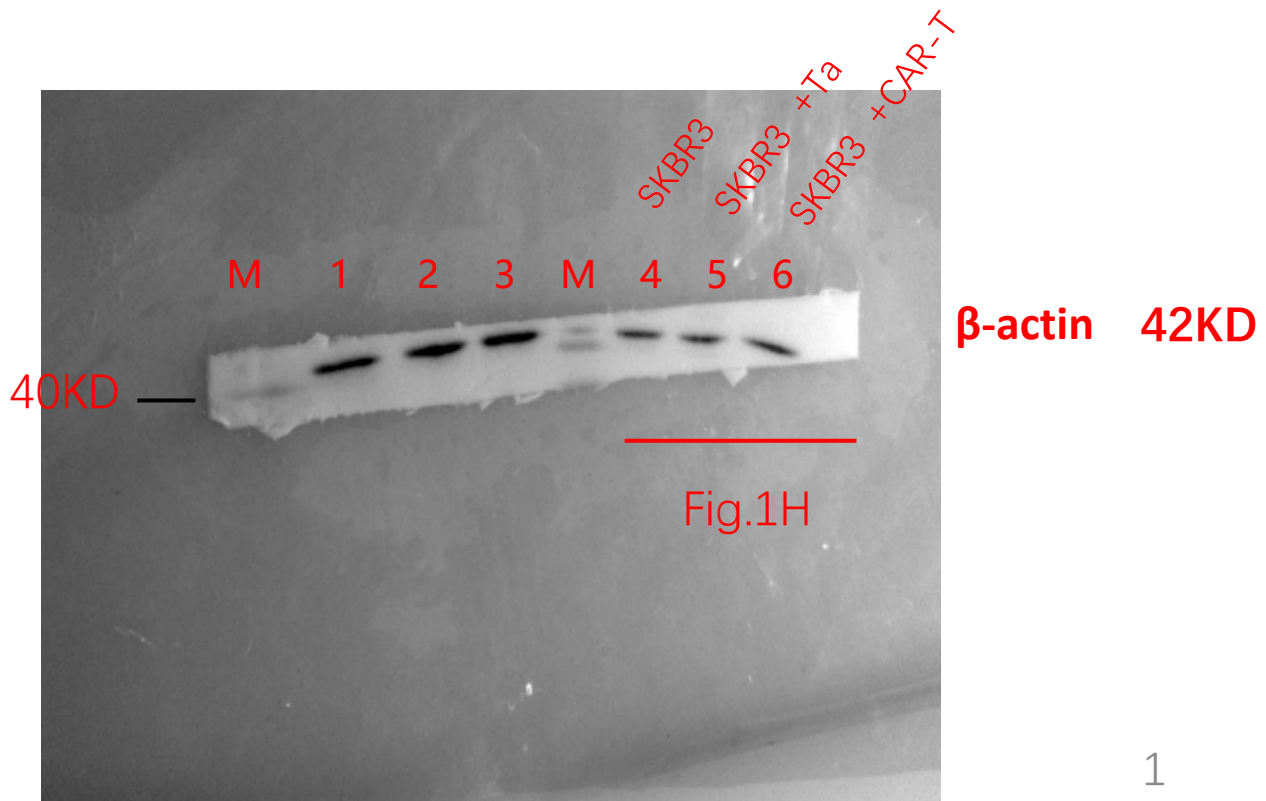

Fig.2B-Left (B7-H4)

M:Marker

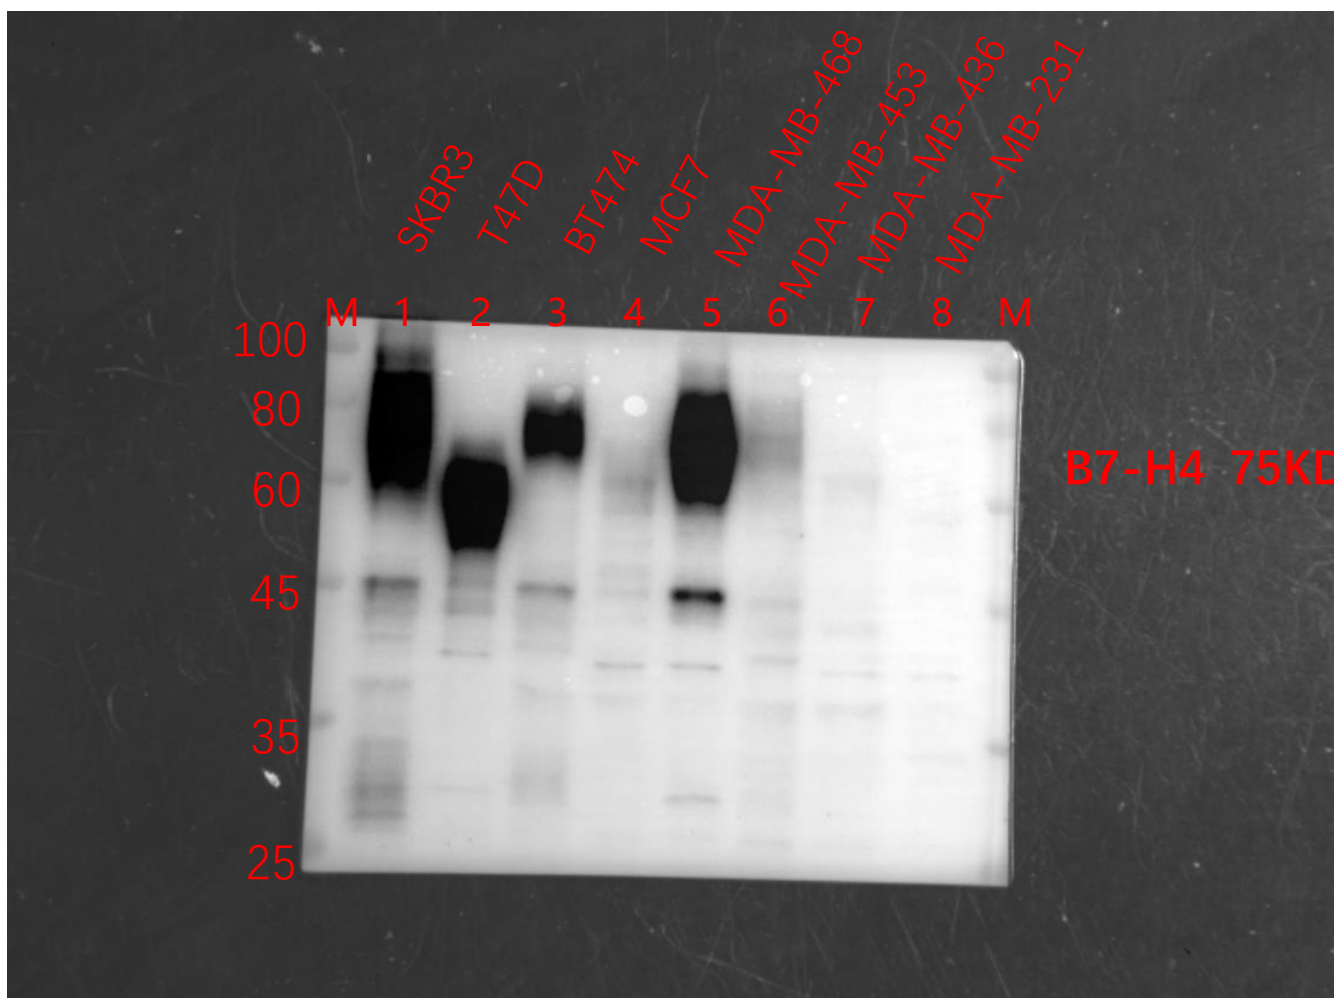

Fig.2B-Left (actin)

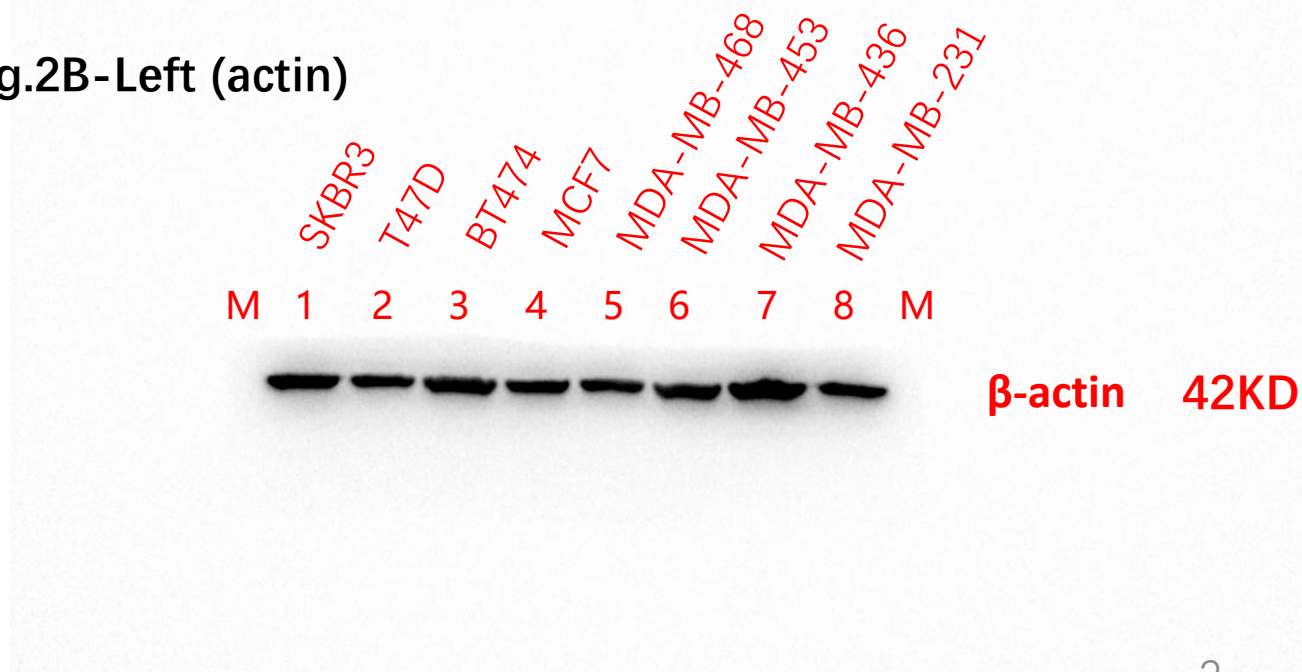

Fig.2B-Right (B7-H4)

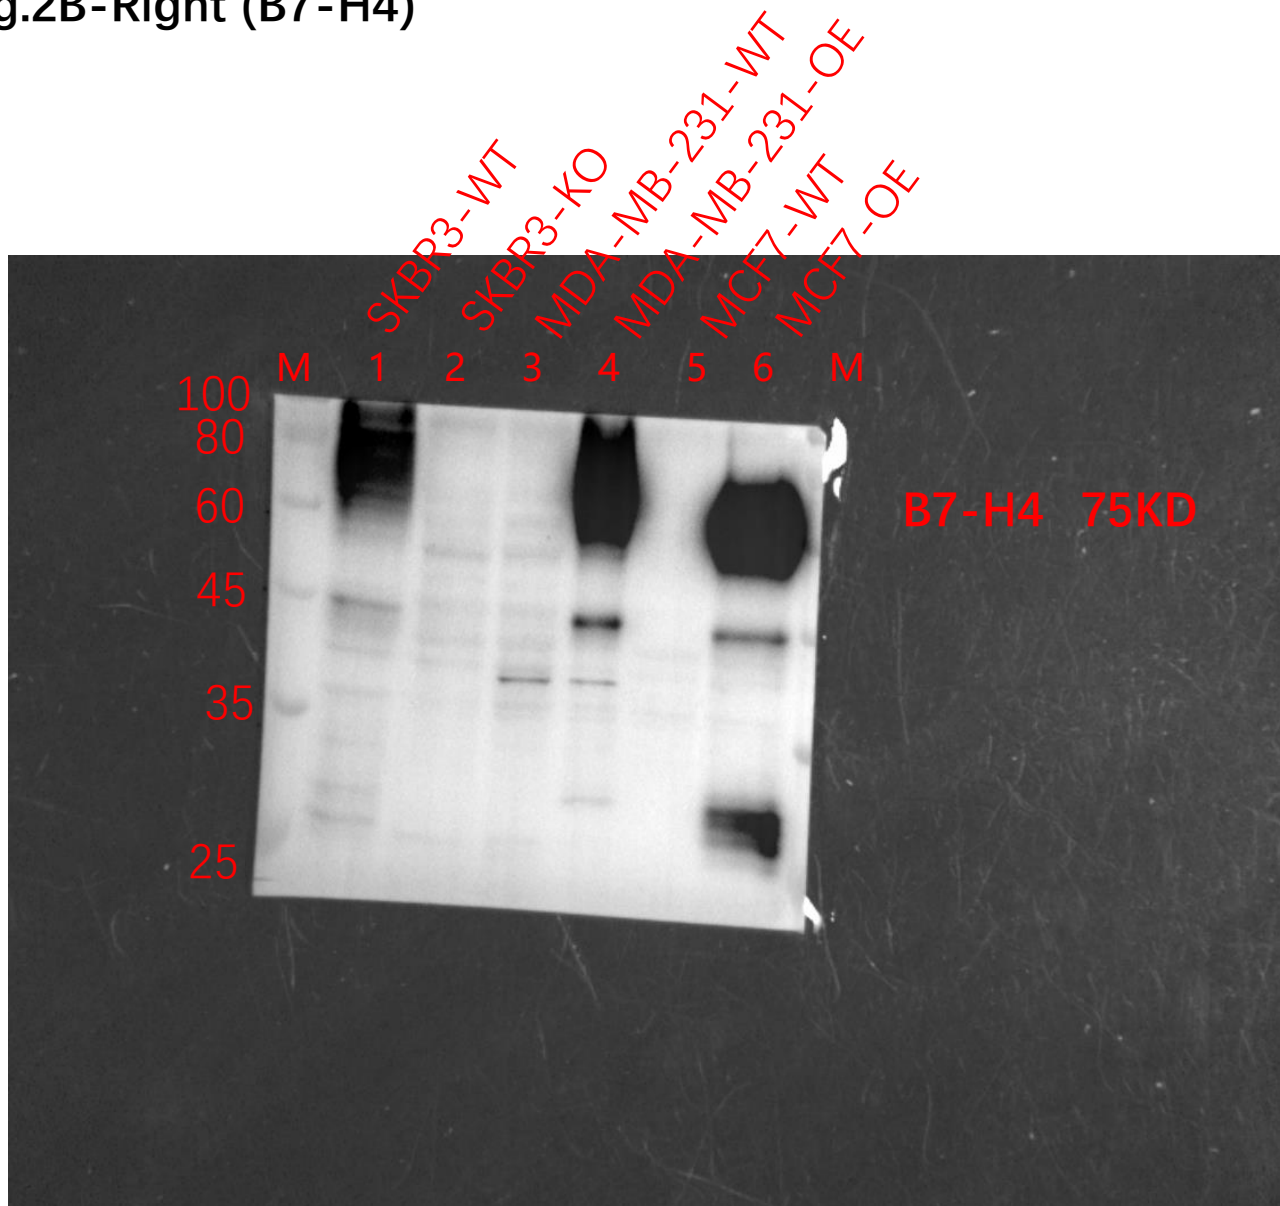

Fig.2B-Right (actin)

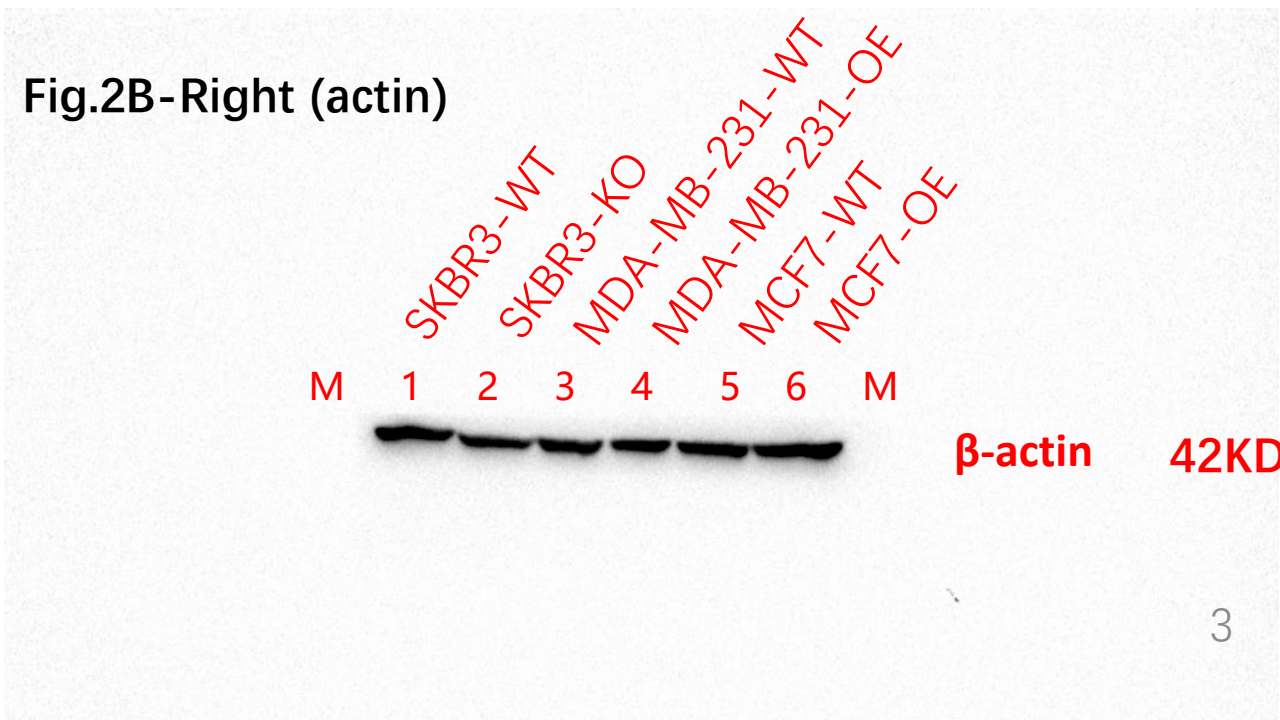

Fig.S1G-(B7-H4)

M:Marker

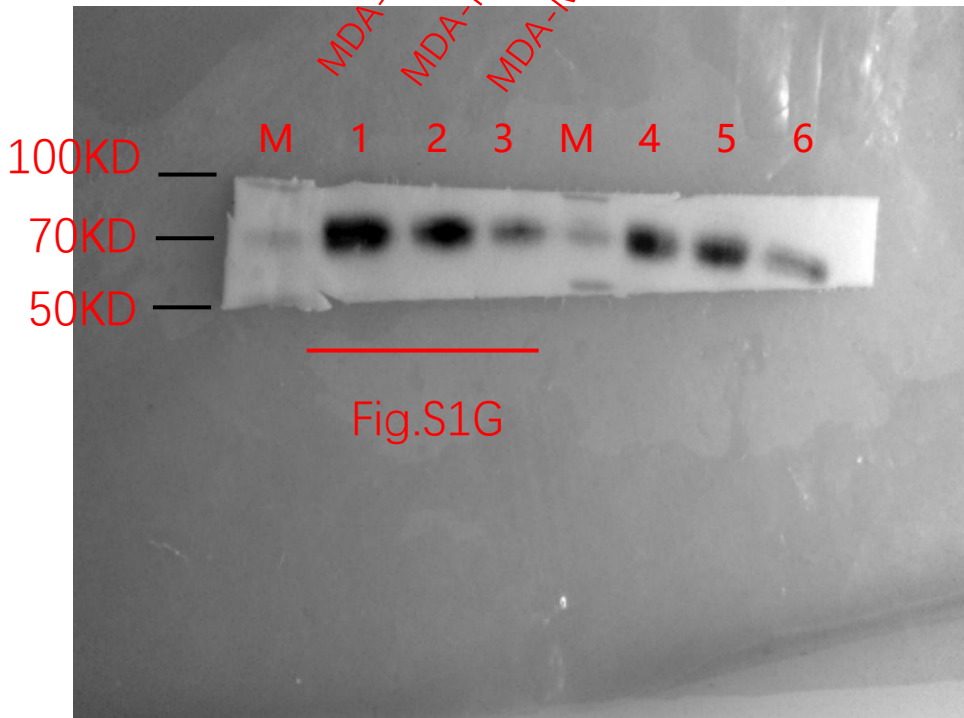

B7-H4 75KD

Fig.S1G-(actin)

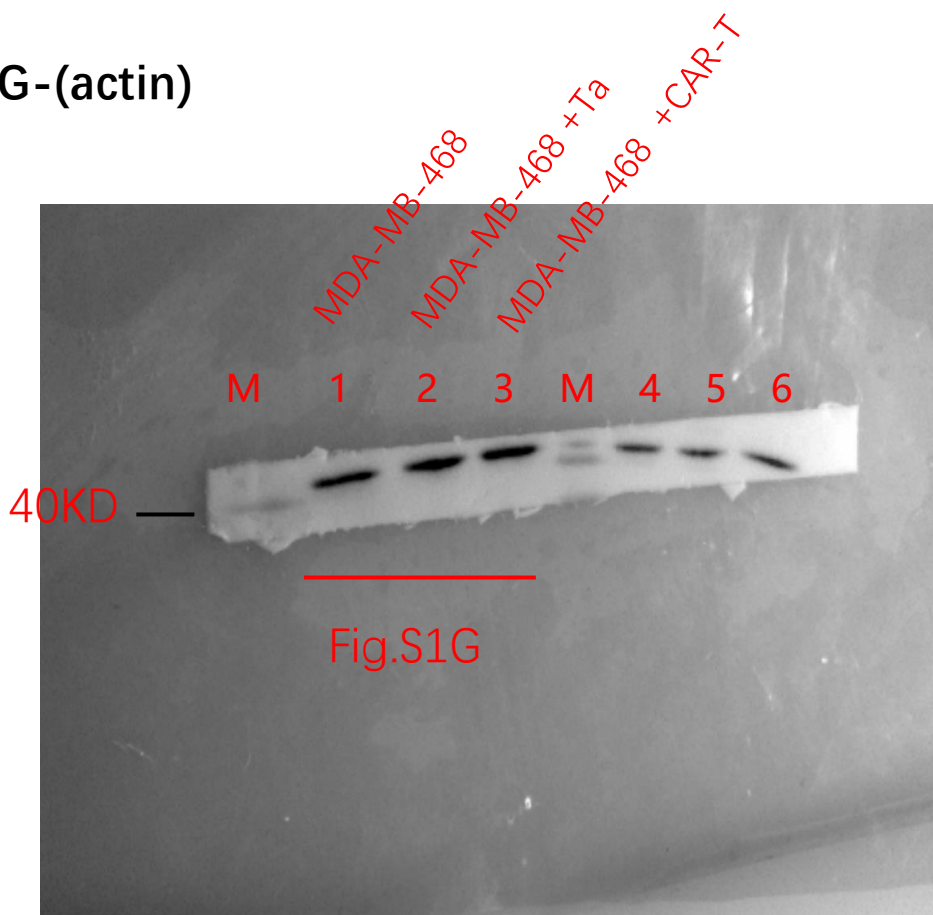

$\beta$ -actin 42KD

Fig.S2D

M:Marker

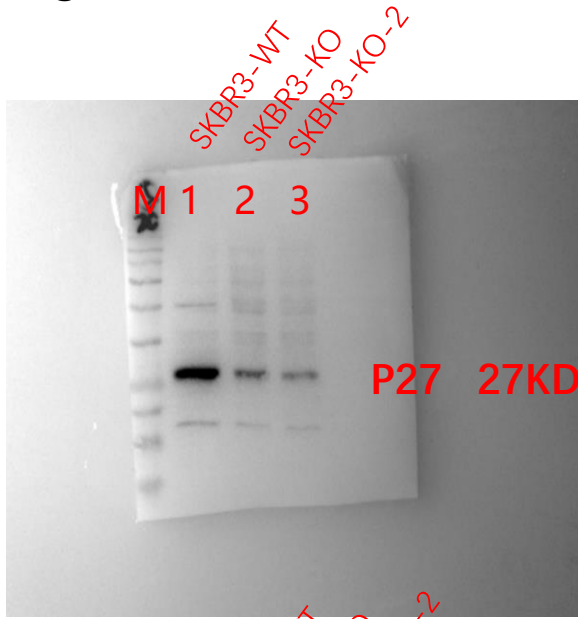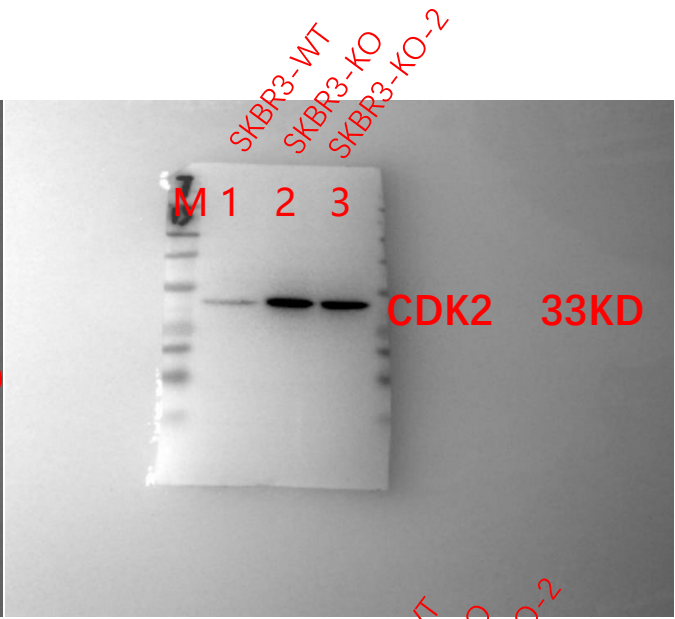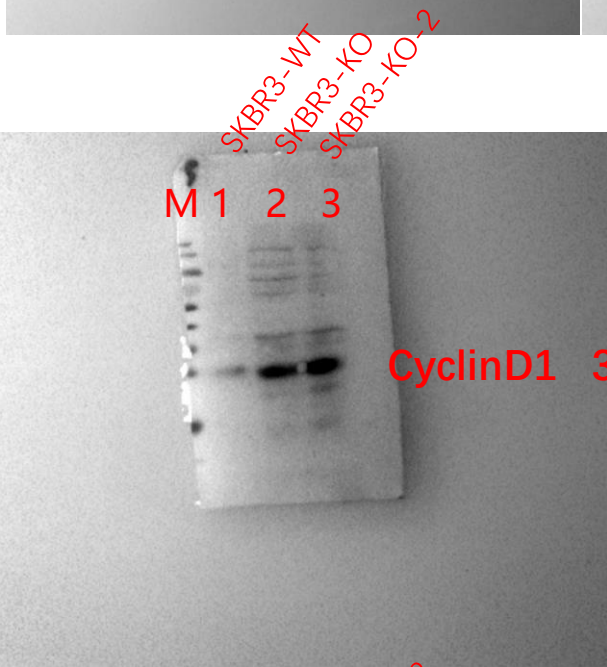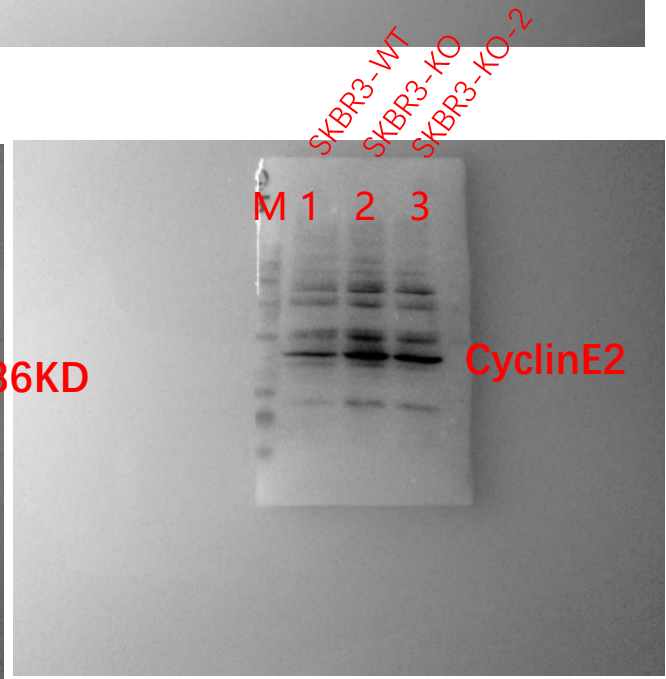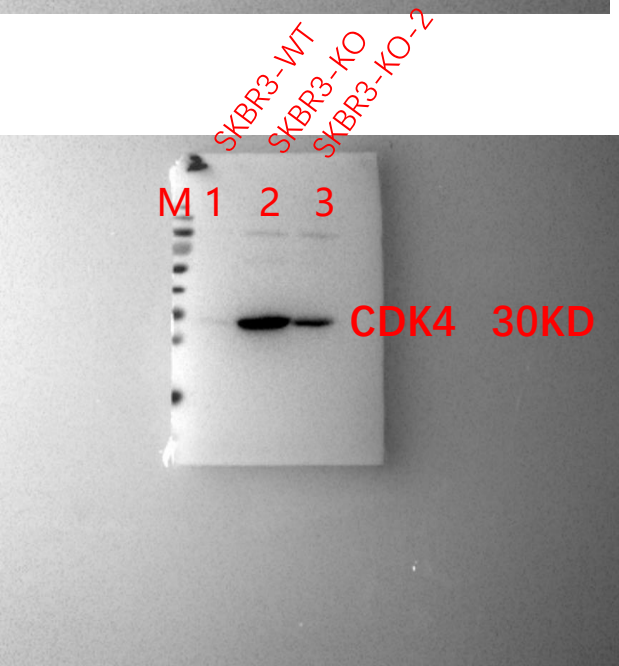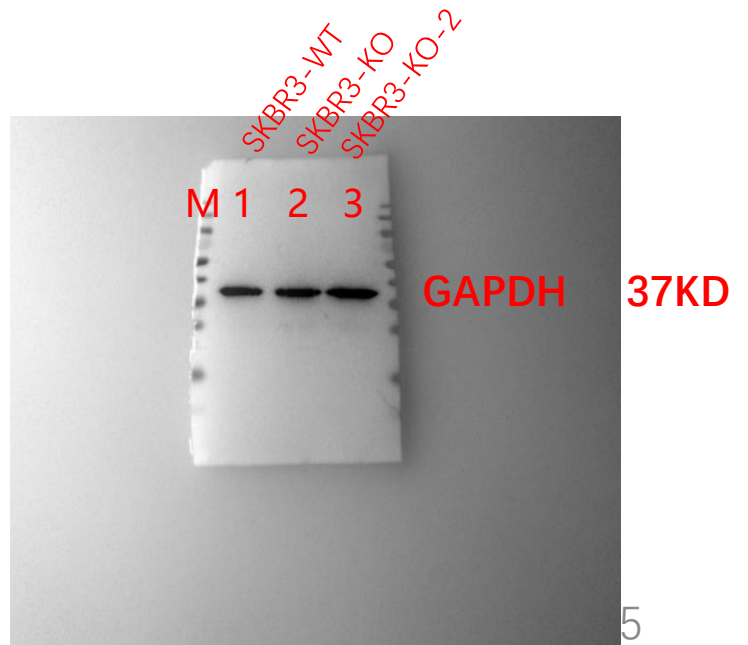

M:Marker

Fig.S3D-Snail

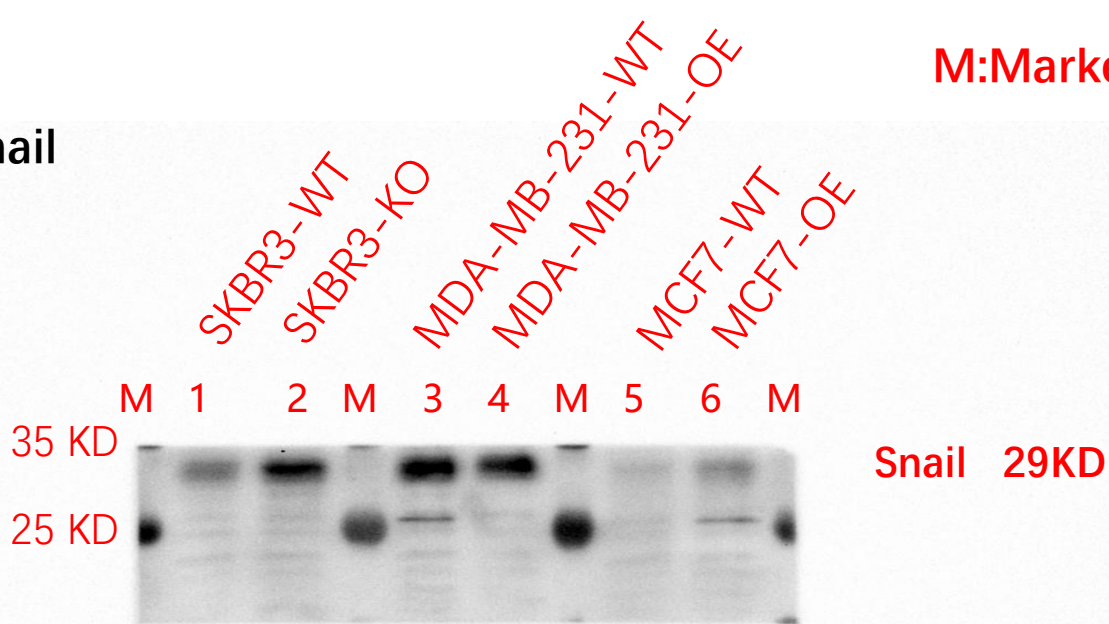

Fig.S3D-ALDH1A1

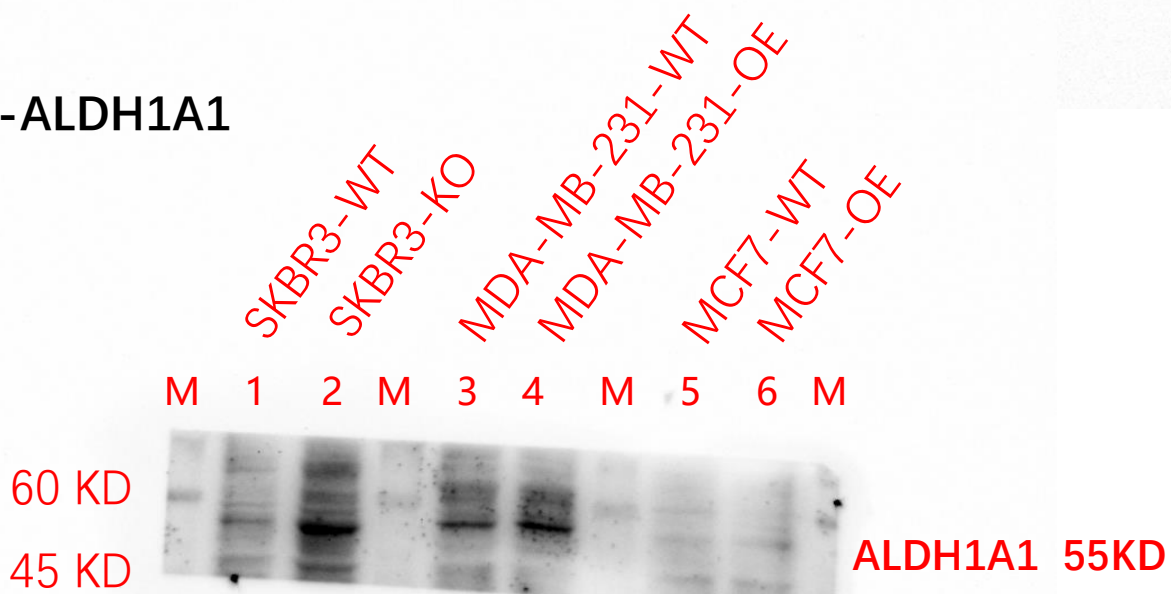

$\beta$ -actin

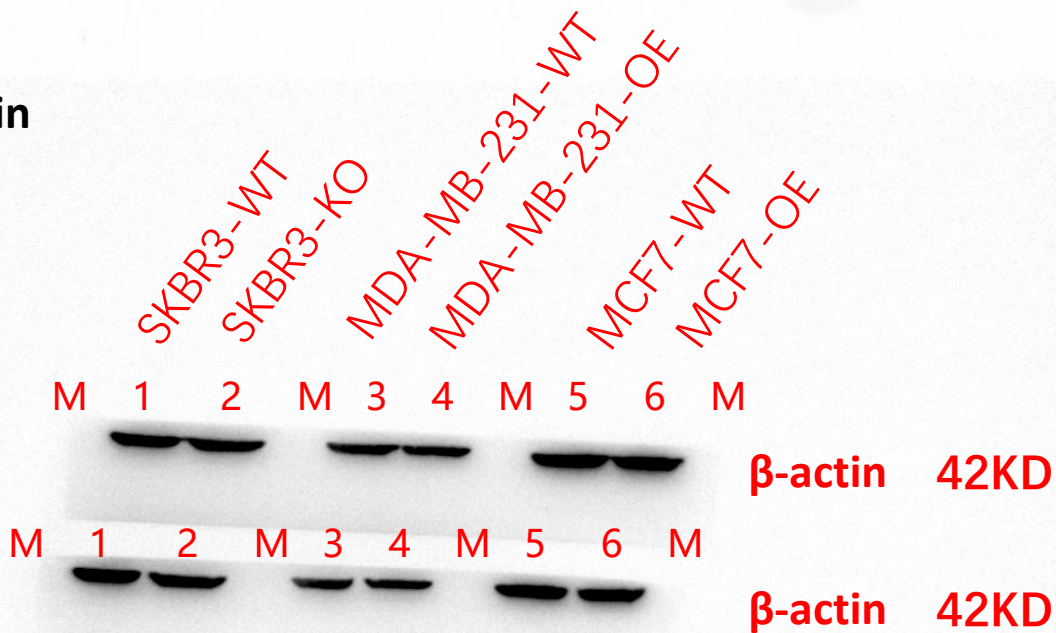

Fig.S3D-N-cadherin

M:Marker

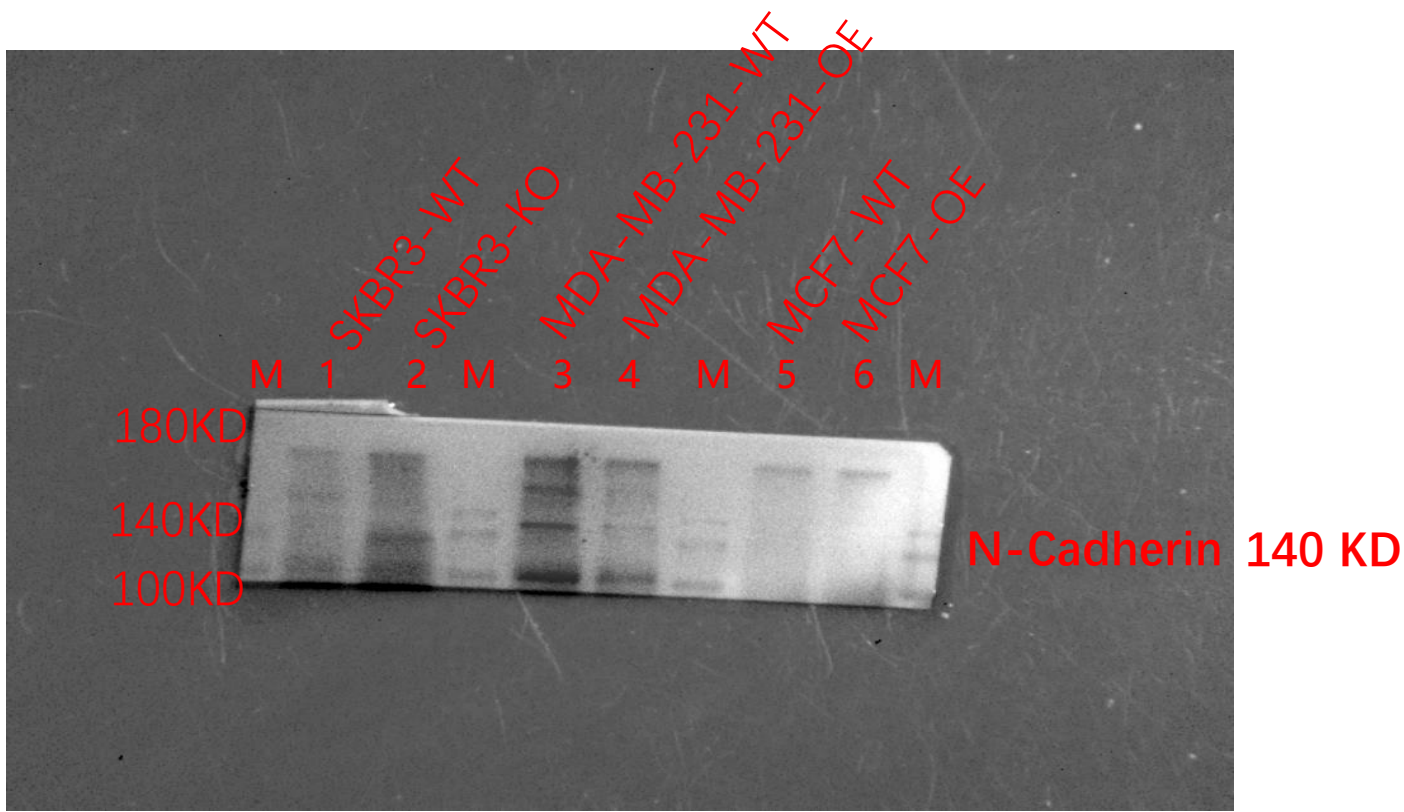

Fig.S3D-β-actin

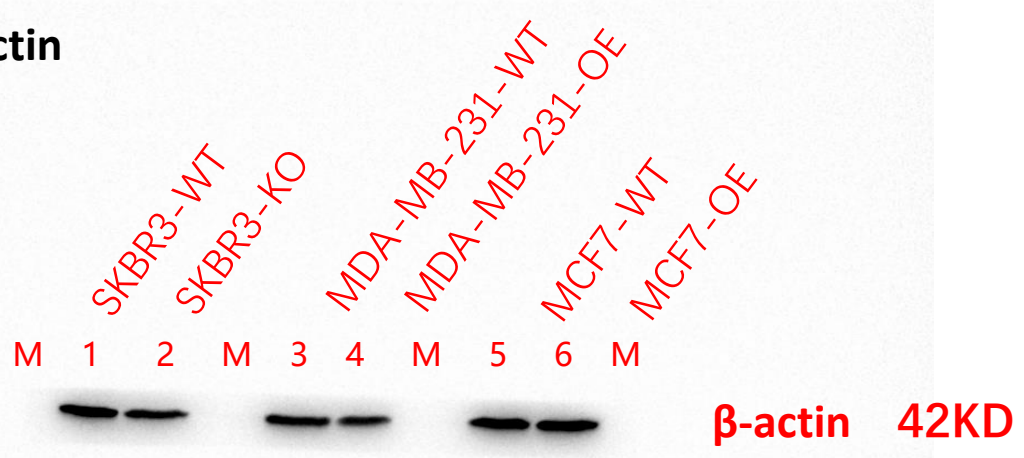

Fig.S3D-CD24

M:Marker

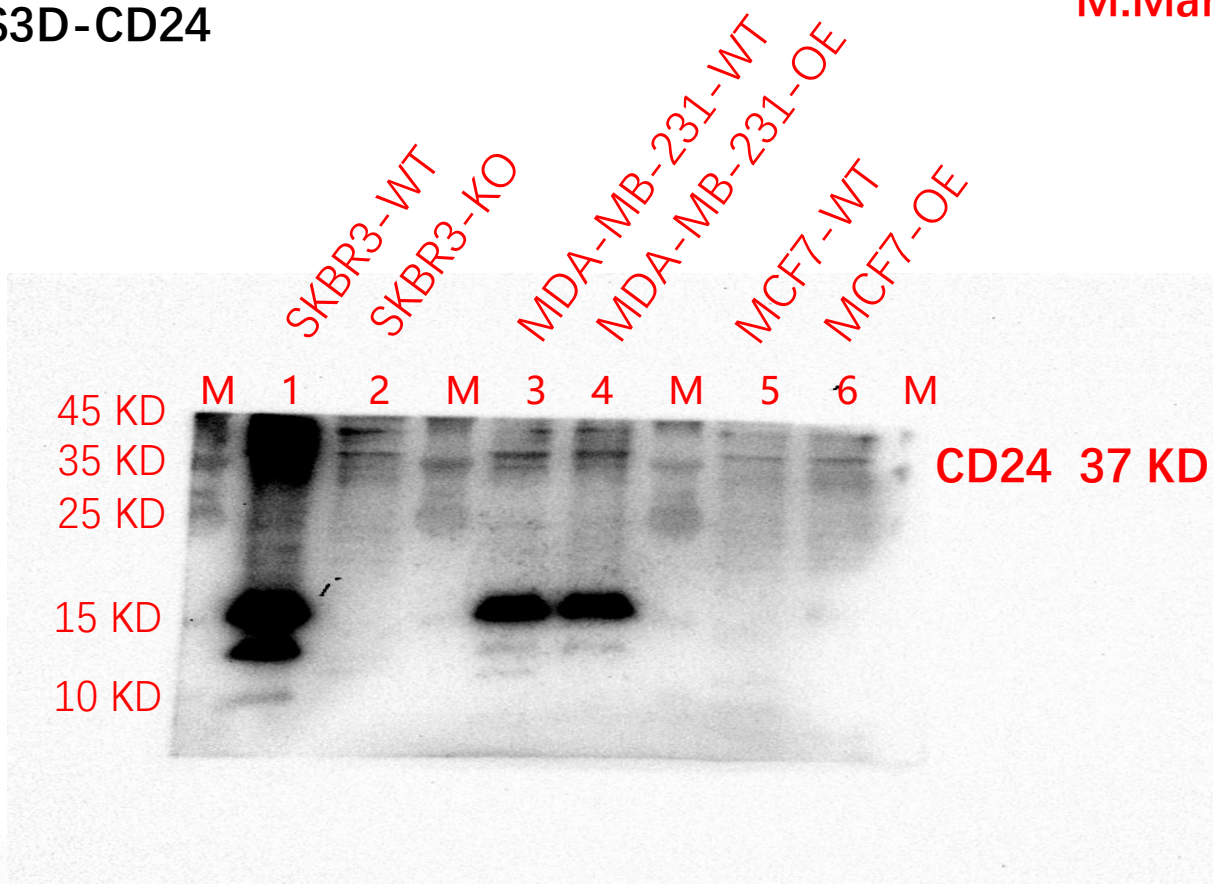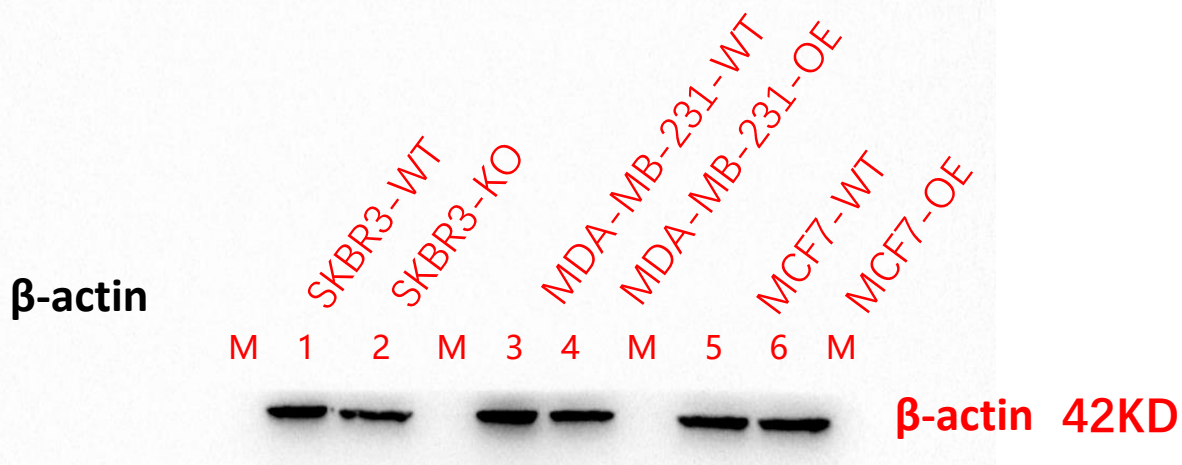



Fig.S3D-Vimentin

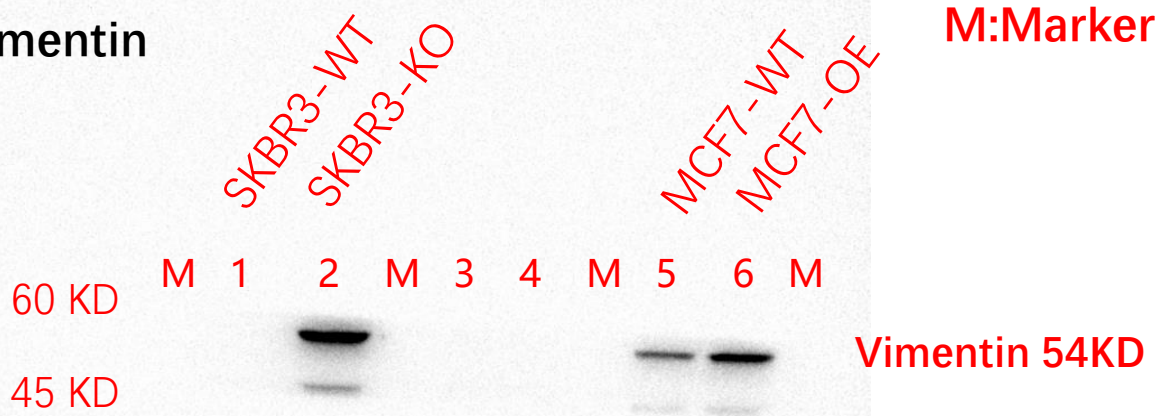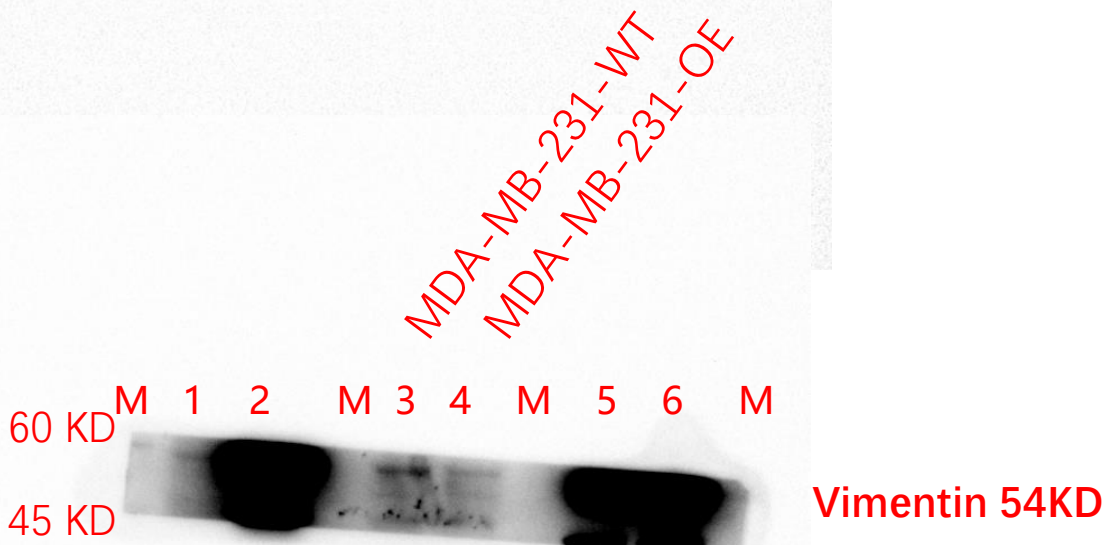

$\beta$ -actin

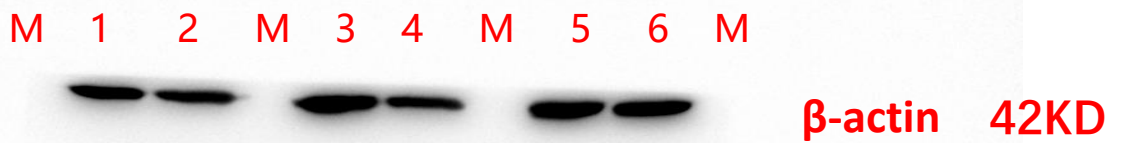

Fig.S3D-Twist1

M:Marker

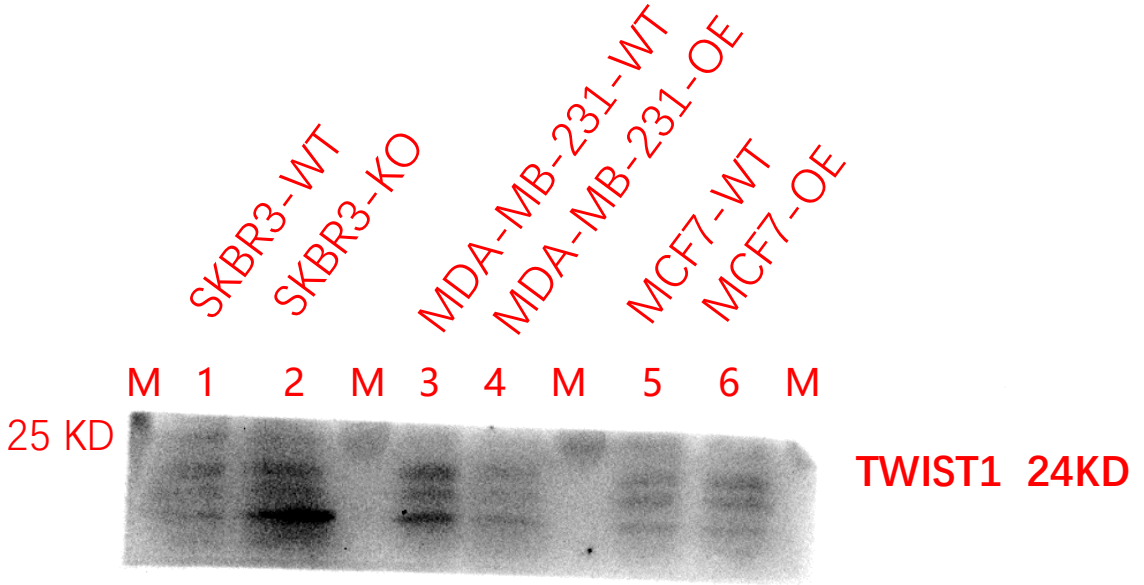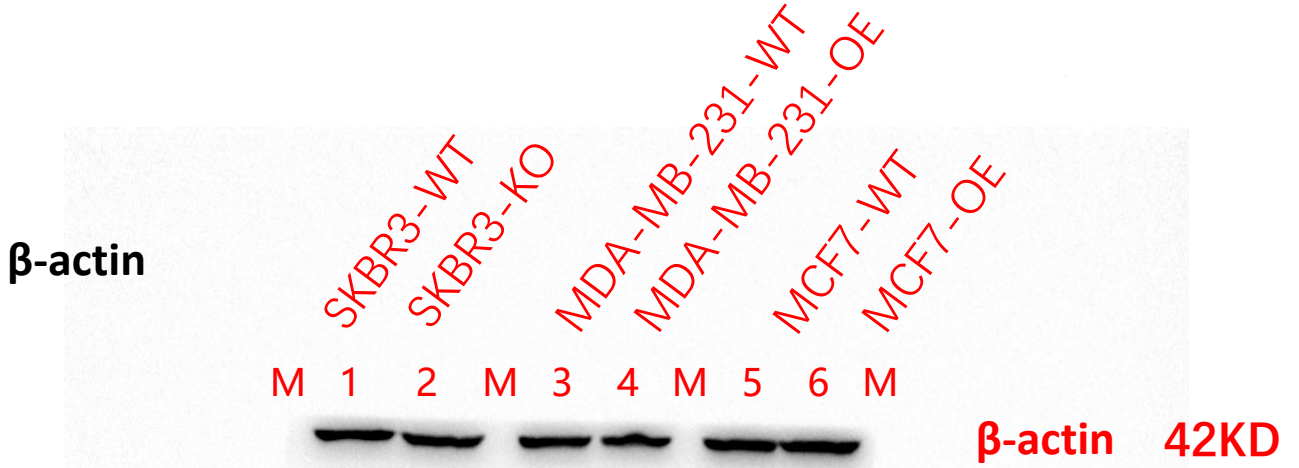

Fig.S4F-H3K27me3

M:Marker

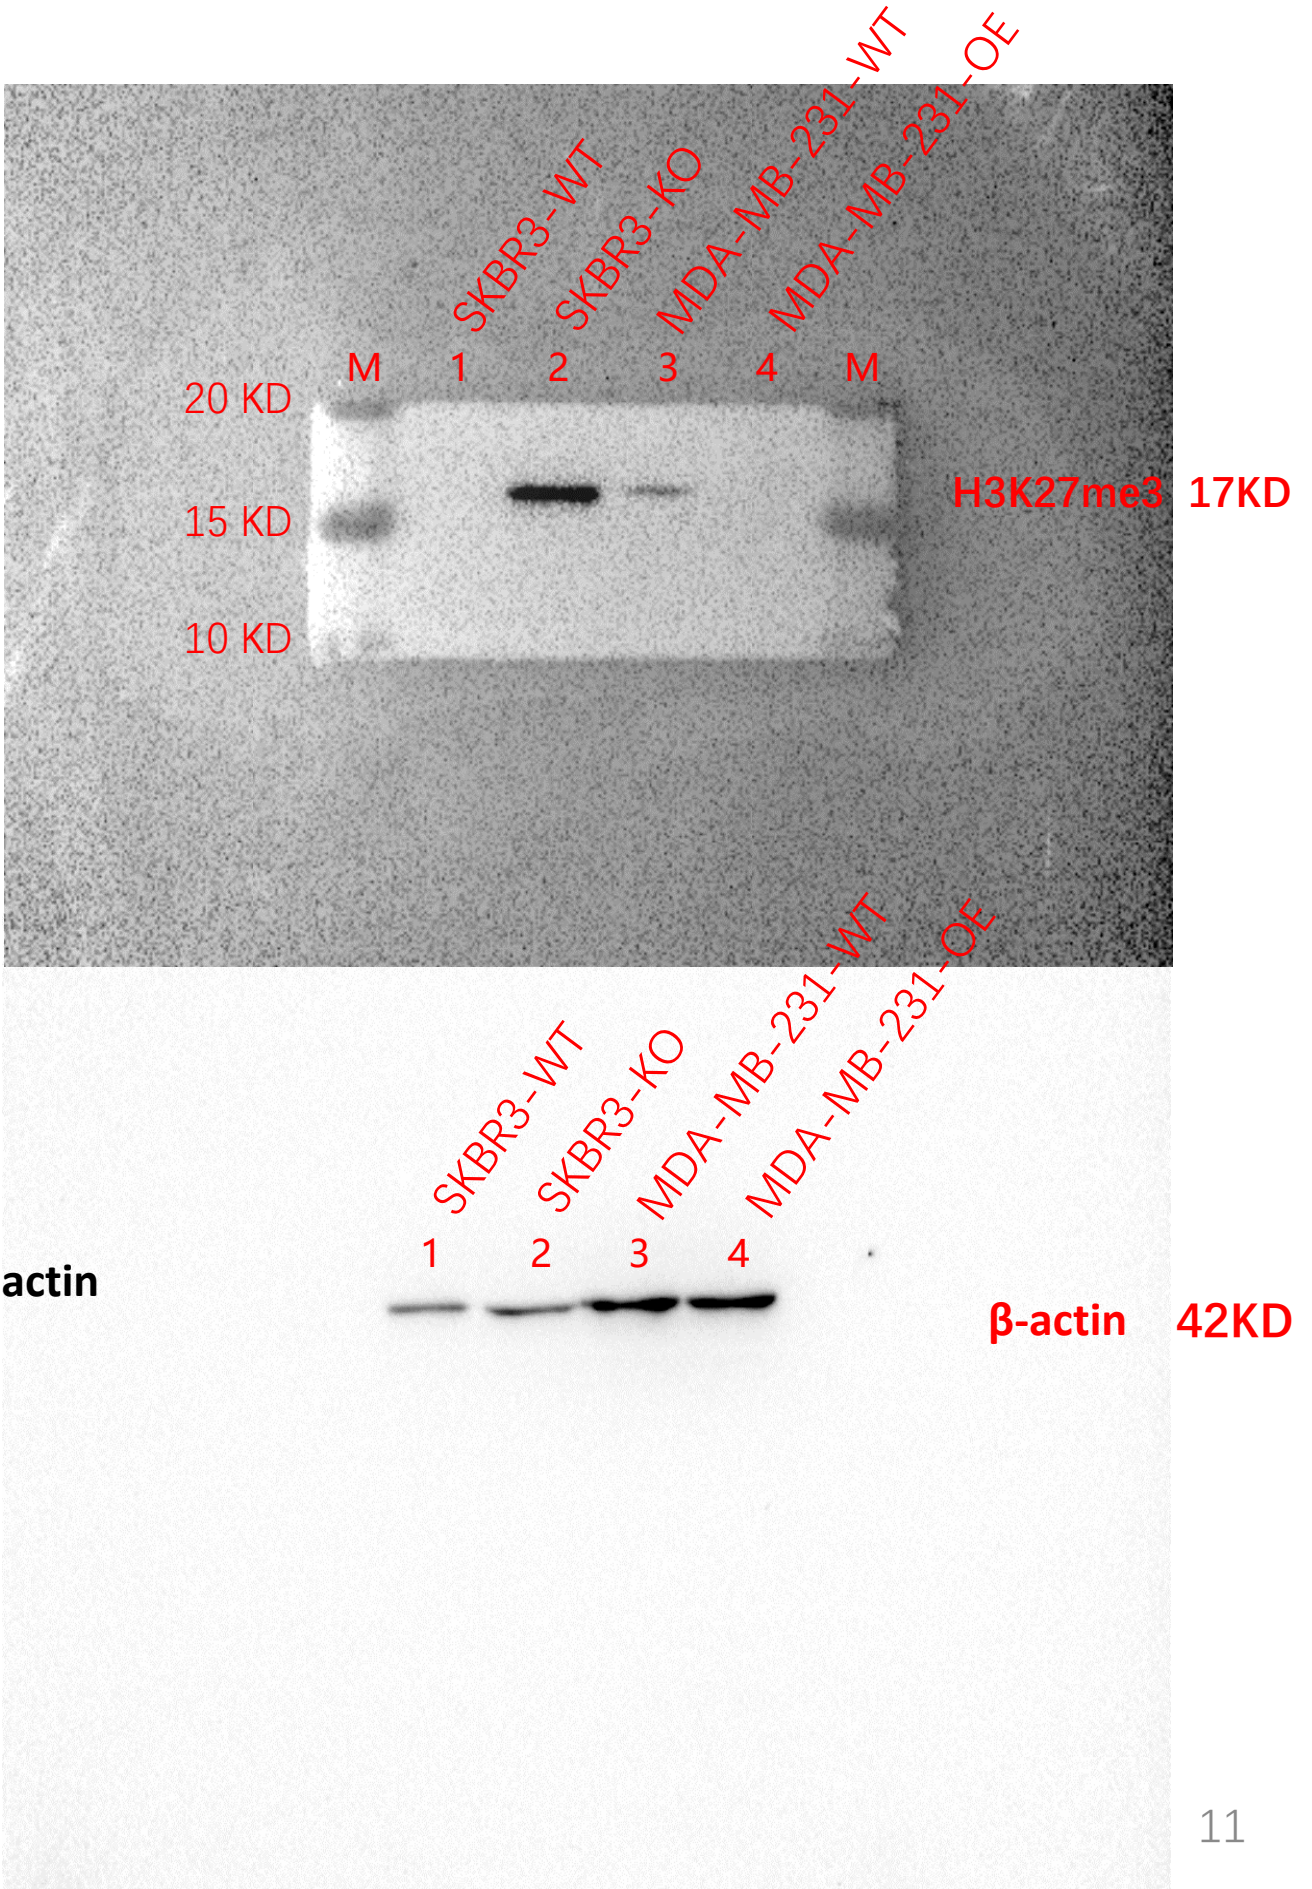

Supplement: MOESM7 [file 26126760]
